# Supplementary material
Source: PubMed Central journal article supplement (PMC5880701)
Supplement: NIHMS911567-supplement-supplement_1.pdf [file NIHMS911567-supplement-supplement_1.pdf]

Figure SF1. Study Flow-Chart

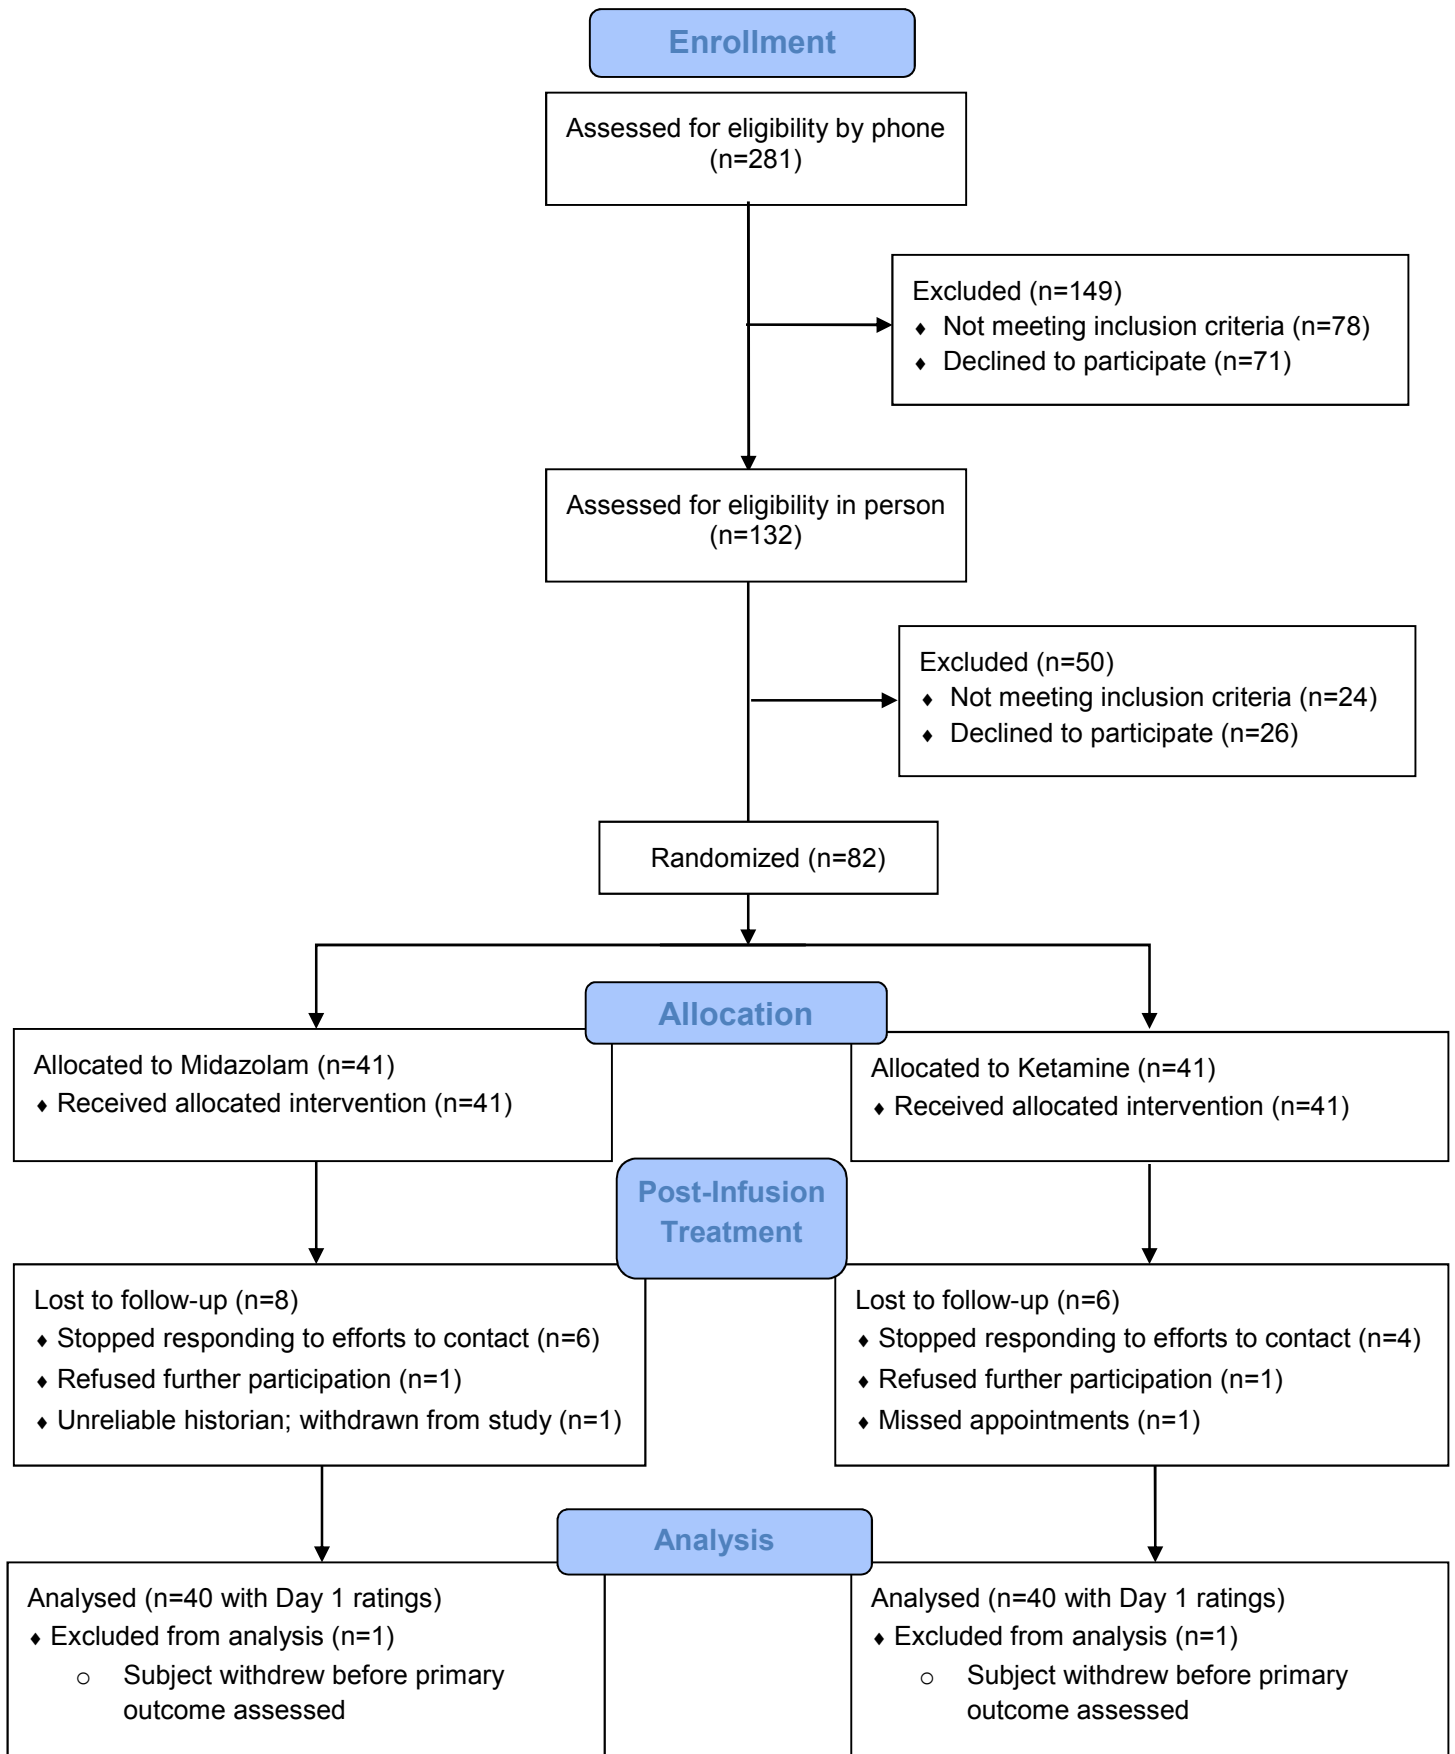

**Table SF1. Medication Classes at Baseline for Both Treatment Groups Combined (N=80)**

| <b>Medication</b>        | <b>N</b> | <b>%</b> |
|--------------------------|----------|----------|
| <b>Antidepressant</b>    | 43       | 53.75    |
| <b>SSRI</b>              | 14       | 17.5     |
| <b>SNRI</b>              | 15       | 18.75    |
| <b>Tricyclic</b>         | 6        | 7.5      |
| <b>MAOI</b>              | 1        | 1.25     |
| <b>Other<sup>a</sup></b> | 25       | 31.25    |
| <b>Anticonvulsant</b>    | 21       | 26.25    |
| <b>Antipsychotic</b>     | 14       | 17.5     |
| <b>Benzodiazepine</b>    | 27       | 33.75    |
| <b>Lithium</b>           | 2        | 2.5      |

<sup>a</sup>Other antidepressants: bupropion, trazodone, mirtazapine, vortioxetine, vilazodone.

**Table SF2. Suicidal Ideation Severity During the Study for Both Treatment Groups Combined**

|                                       |                             |       |      |                      |      | Test of Change |       |        |                      |       |        |
|---------------------------------------|-----------------------------|-------|------|----------------------|------|----------------|-------|--------|----------------------|-------|--------|
|                                       | Scale for Suicidal Ideation |       |      | Change from Baseline |      | From Baseline  |       |        | From Last Time Point |       |        |
| Time Point                            | N                           | Mean  | SD   | Mean                 | SD   | DF             | t     | p      | DF                   | t     | p      |
| Baseline <sup>a</sup>                 | 80                          | 14.98 | 6.64 | .                    | .    | .              | .     | .      | .                    | .     | .      |
| 230 minutes after randomized infusion | 80                          | 7.43  | 6.70 | -7.55                | 7.10 | 465            | -9.57 | <.0001 | .                    | .     | .      |
| Day 1 after randomized infusion       | 80                          | 8.84  | 7.07 | -6.14                | 7.18 | 465            | -7.78 | <.0001 | 465                  | -2.03 | 0.0427 |
| Week1                                 | 73                          | 6.88  | 7.40 | -7.95                | 8.49 | 465            | -9.60 | <.0001 | 465                  | 2.26  | 0.0243 |
| Week2                                 | 70                          | 6.60  | 7.01 | -8.11                | 8.61 | 465            | -9.69 | <.0001 | 465                  | 0.22  | 0.8252 |
| Week3                                 | 67                          | 6.75  | 7.94 | -8.15                | 9.25 | 465            | -9.27 | <.0001 | 465                  | -0.35 | 0.7272 |
| Week4                                 | 60                          | 7.40  | 7.75 | -7.93                | 9.34 | 465            | -8.71 | <.0001 | 465                  | -0.32 | 0.7467 |
| Week5                                 | 61                          | 6.89  | 7.47 | -7.75                | 9.02 | 465            | -9.15 | <.0001 | 465                  | 0.42  | 0.6727 |
| Week6                                 | 61                          | 6.72  | 7.63 | -8.52                | 8.60 | 465            | -9.61 | <.0001 | 465                  | 0.49  | 0.6255 |

<sup>a</sup>Baseline is within 24 hours before infusion.

**Table SF3. Depression Severity During the Study for Both Treatment Groups Combined**

|                                 |    |                                          |      |                      |      | Test of Change |        |        |                      |       |        |
|---------------------------------|----|------------------------------------------|------|----------------------|------|----------------|--------|--------|----------------------|-------|--------|
|                                 |    | 17-Item Hamilton Depression Rating Scale |      | Change from Baseline |      | From Baseline  |        |        | From Last Time Point |       |        |
| Time Point                      | N  | Mean                                     | SD   | Mean                 | SD   | DF             | t      | p      | DF                   | t     | p      |
| Baseline <sup>a</sup>           | 80 | 22.43                                    | 4.31 | .                    | .    | .              | .      | .      | .                    | .     | .      |
| Day 1 after randomized infusion | 80 | 16.76                                    | 7.23 | -5.66                | 6.86 | 382            | -7.47  | <.0001 | .                    | .     | .      |
| Week1                           | 72 | 15.51                                    | 6.98 | -6.93                | 7.03 | 382            | -8.35  | <.0001 | 382                  | 1.17  | 0.2428 |
| Week2                           | 70 | 14.63                                    | 6.80 | -7.86                | 6.94 | 382            | -9.46  | <.0001 | 382                  | 1.20  | 0.2320 |
| Week3                           | 66 | 14.30                                    | 6.64 | -7.92                | 6.79 | 382            | -9.42  | <.0001 | 382                  | 0.14  | 0.8873 |
| Week4                           | 60 | 14.00                                    | 6.76 | -8.25                | 7.52 | 382            | -9.64  | <.0001 | 382                  | 0.49  | 0.6277 |
| Week5                           | 61 | 13.74                                    | 7.63 | -8.64                | 7.81 | 382            | -10.09 | <.0001 | 382                  | 0.38  | 0.7008 |
| Week6                           | 59 | 13.97                                    | 7.43 | -8.58                | 7.37 | 382            | -9.94  | <.0001 | 382                  | -0.05 | 0.9597 |

<sup>a</sup>Baseline is within 24 hours before infusion.

**Table SF4. Infusion-related Cardio-respiratory Effects in Patients with Major Depressive Disorder and Clinically Significant Suicidal Ideation Given a Single Infusion of Ketamine or Midazolam<sup>a</sup>**

| <b>Variable</b>                                           | <b>Midazolam N=40<br/>Mean (SD)</b> | <b>Ketamine N=40<br/>Mean (SD)</b> | <b>Open Ketamine N=34<br/>Mean (SD)</b> |
|-----------------------------------------------------------|-------------------------------------|------------------------------------|-----------------------------------------|
| <b>Baseline systolic blood pressure (SBP)<sup>b</sup></b> | 120 (9.8)                           | 120 (10.6)                         | 120 (21.5)                              |
| <b>Baseline diastolic blood pressure (DBP)</b>            | 74 (7.0)                            | 74 (9.1)                           | 75 (7.2)                                |
| <b>Peak SBP</b>                                           | 124 (11.9)                          | 135 (13.7)                         | 140 (16.1)                              |
| <b>Peak DBP</b>                                           | 78 (7.5)                            | 88 (9.9)                           | 92 (10.1)                               |
| <b>Minutes to return to baseline BP<sup>c</sup></b>       | 0 (0)                               | 5.3 (9.0)                          | 5.7 (7.7)                               |
| <b>Baseline oxygen saturation</b>                         | 98 (1.5)                            | 98 (0.96)                          | 98 (1.2)                                |
| <b>Lowest oxygen saturation<sup>d</sup></b>               | 96 (2.3)                            | 97 (1.8)                           | 97 (1.5)                                |
| <b>Baseline respiratory rate</b>                          | 15 (3.3)                            | 16 (4.0)                           | 15 (3.9)                                |
| <b>Lowest respiratory rate<sup>d</sup></b>                | 12 (2.9)                            | 11 (1.8)                           | 11 (2.3)                                |

<sup>a</sup>Vital signs were measured every five minutes during treatment with ketamine 0.5 mg/kg or midazolam 0.02 mg/kg in 100 ml normal saline infused over 40 minutes, adjunctive to current, non-benzodiazepine medications.

<sup>b</sup>Blood pressure in millimeters mercury (mm Hg).

<sup>c</sup>Return to baseline blood pressure was operationalized as DBP within 10mm Hg of baseline or DBP<85.

<sup>d</sup>Midazolam was associated with a Mean=1.60 (SD=1.96) point decrease in oxygen saturation from baseline versus a 0.90 (SD=1.22) point decrease with ketamine (t=1.92, df=78, p=0.0584). Ketamine was associated with a decrease in respiratory rate of Mean=4.98 (SD=4.08) breaths per minute compared to 3.25 (SD=3.48) for midazolam (t=-2.04, df=78, p=0.0452).

**Figure SF2. Dissociative Effects in Suicidal Patients with Major Depression Randomized to a Sub-anesthetic Infusion of Ketamine or Midazolam<sup>a,b</sup>**

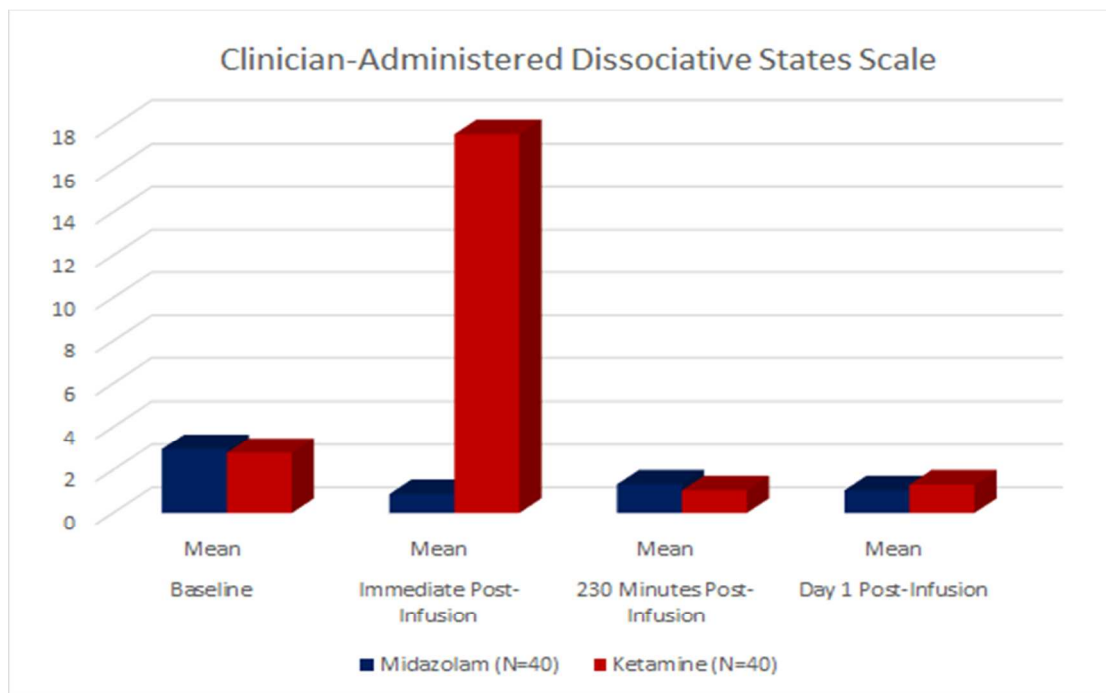

<sup>a</sup>Immediate post-infusion rating done by physician supervising infusion.

<sup>b</sup>230 Minute post-infusion rating done by clinical rater who was not present during infusion.

**Table SF5. Systematic Assessment for Treatment Emergent Events-General Inquiry (SAFTEE) ratings in a study of ketamine vs. midazolam in patients with major depression and clinically significant suicidal ideation<sup>a</sup>**

| SEVERITY OF EVENTS <sup>b</sup>      | Ketamine (N=40) N (%) |                         |         | Midazolam (N=40) N (%) |                         |         |
|--------------------------------------|-----------------------|-------------------------|---------|------------------------|-------------------------|---------|
|                                      | Baseline              | Immediate post-infusion | Day 1   | Baseline               | Immediate post-infusion | Day 1   |
| Patients with any severe event       | 2 (5)                 | 3 (8)                   | 0       | 1 (3)                  | 1 (3)                   | 0       |
| Patients with any moderate event     | 3 (8)                 | 6 (15)                  | 3 (8)   | 8 (20)                 | 6 (15)                  | 3 (8)   |
| Patients with any mild event         | 6 (15)                | 14 (35)                 | 8 (20)  | 7 (18)                 | 25 (63)                 | 10 (25) |
| Patients with any event <sup>c</sup> | 11 (28)               | 21 (53)                 | 10 (25) | 15 (38)                | 32 (80)                 | 12 (30) |
| TYPE OF EVENT                        | Ketamine (N=40) N (%) |                         |         | Midazolam (N=40) N (%) |                         |         |
|                                      | Baseline              | Immediate post-infusion | Day 1   | Baseline               | Immediate post-infusion | Day 1   |
| Numbness                             |                       | 6 (15)                  |         |                        | 1 (3)                   |         |
| Perceptual problems                  |                       | 5 (13)                  | 2 (5)   | 1 (3)                  |                         | 1 (3)   |
| Dizziness/faintness                  |                       | 5 (13)                  | 1 (3)   |                        |                         |         |
| Drowsiness                           |                       | 5 (13)                  |         |                        | 16 (40)                 |         |
| Headache                             | 3 (8)                 | 2 (5)                   | 1 (3)   | 8 (20)                 | 5 (13)                  | 3 (8)   |
| Dry Mouth                            |                       | 2 (5)                   | 1 (3)   |                        |                         |         |
| Nausea                               |                       | 2 (5)                   |         |                        | 1 (3)                   |         |
| Cold sensation                       |                       | 1 (3)                   |         |                        | 4 (10)                  |         |
| Vomiting                             |                       | 1 (3)                   |         |                        |                         |         |
| Rapid heartbeat                      |                       | 1 (3)                   |         |                        |                         |         |
| Difficulty swallowing                |                       | 1 (3)                   |         |                        |                         |         |
| Musculoskeletal pain                 | 4 (10)                |                         | 3 (8)   | 2 (5)                  |                         | 2 (5)   |
| Fatigue                              | 3 (8)                 |                         | 2 (5)   | 2 (5)                  | 11 (28)                 | 2 (5)   |
| Constipation                         | 3 (8)                 |                         | 1 (3)   |                        |                         |         |
| Anxiety                              |                       |                         | 1 (3)   |                        |                         |         |
| Memory problems                      |                       |                         | 1 (3)   |                        |                         |         |
| Loss of consciousness                |                       |                         |         |                        | 1 (3)                   |         |
| Diarrhea                             | 1 (3)                 |                         |         | 1 (3)                  |                         | 2 (5)   |
| Stomach/abdominal discomfort         |                       |                         |         | 2 (5)                  |                         | 1 (3)   |
| Irritability                         |                       |                         |         |                        |                         | 1 (3)   |
| Interrupted sleep                    |                       |                         |         |                        |                         | 1 (3)   |
| Tinnitus                             | 1 (3)                 |                         |         |                        |                         |         |
| Concentration difficulty             | 1 (3)                 |                         |         |                        |                         |         |
| Sore throat                          | 1 (3)                 |                         |         |                        |                         |         |
| Skin irritation                      |                       |                         |         | 1 (3)                  |                         |         |
| Appetite increase                    |                       |                         |         | 1 (3)                  |                         |         |
| Edema                                |                       |                         |         | 1 (3)                  |                         |         |

<sup>a</sup>Comparisons between treatment groups: frequency of all events immediately post-infusion (U=615.50, p=0.0508) and on Day 1 (U=768.00, p=0.6932); severity of events immediately post-infusion (U=645.00, p=0.1162) and on Day 1 (U=771.00, p=0.7216).

<sup>b</sup>Patients who experienced multiple events with varying severity are counted in more than one severity category.

**SF6. Table of Serious Adverse Events Requiring Institutional Review Board (IRB) Report**

| Randomized Group | Responder <sup>a</sup> | Remitter <sup>b</sup> | Open Infusion | Open infusion response | Timepoint of event      | Brief Description                                                       |
|------------------|------------------------|-----------------------|---------------|------------------------|-------------------------|-------------------------------------------------------------------------|
| Midazolam        | No                     | No                    | Yes           | Remitter               | Month 4                 | Zolpidem misuse without suicidal intent                                 |
| Ketamine         | Yes                    | No                    | No            |                        | Week 7 and Month 6      | Medical illness unrelated to study                                      |
| Midazolam        | Yes                    | Yes                   | No            |                        | Month 6                 | Inpatient admission for increased suicidal ideation                     |
| Ketamine         | Yes                    | No                    | No            |                        | Week 6                  | Inpatient admission for increased suicidal ideation                     |
| Ketamine         | No                     | No                    | No            |                        | Month 5                 | Overdose resulting in inpatient admission                               |
| Midazolam        | Yes                    | No                    | Yes           | Remitter               | Before study procedures | Overdose, discussed with therapist, did not lead to inpatient admission |
| Ketamine         | Yes                    | No                    | No            |                        | Month 7                 | Overdose resulting in inpatient admission                               |
| Midazolam        | No                     | No                    | Yes           | Non-responder          | Month 4                 | Inpatient admission for increased suicidal ideation                     |
| Ketamine         | Yes                    | Yes                   | No            |                        | Week 2                  | Overdose                                                                |

<sup>a</sup>Response = Day 1 Scale for Suicidal Ideation score  $\geq 50\%$  lower than baseline.

<sup>b</sup>Remission = Day 1 Scale for Suicidal Ideation score  $\geq 50\%$  lower than baseline and  $< 4$ .
